# Supplementary material
Source: Royal Society of Chemistry journal article supplement (https://www.rsc.org/suppdata/ft/1998/3457/k807603.doc)
Supplement: Supplementary file 1 [file k807603.doc]

**Table 1** Adsorption of DTA+ onto laponite in various water-EAN mixtures and molten EAN. QM is the amount of DTA+ adsorbed per gram of laponite, [DTA+sol] is the equilibrium concentration in the solution.

| EAN 0.1 mol L-1 | | |  | EAN 0.2 mol L-1 | | |  | EAN 0.5 mol L-1 | | |  |
| --- | --- | --- | --- | --- | --- | --- | --- | --- | --- | --- | --- |
| [DTA+sol]  /10-4 mol L-1 | QM  /mmol g-1 | [DTA+sol]  /10-4 mol L-1 | | QM  /mmol g-1 | [DTA+sol]  /10-4 mol L-1 | | QM  /mmol g-1 |  |
| 0.1 | 0.333 | 0.1 | | 0.207 | 0.1 | | 0.205 |  |
| 0.2 | 0.36 | 0.2 | | 0.3 | 0.2 | | 0.26 |  |
| 0.3 | 0.42 | 0.32 | | 0.359 | 0.32 | | 0.318 |  |
| 0.6 | 0.52 | 0.5 | | 0.413 | 0.6 | | 0.4 |  |
| 1 | 0.6 | 1 | | 0.553 | 1 | | 0.515 |  |
| 2 | 0.67 | 3 | | 0.725 | 3 | | 0.78 |  |
| 4 | 0.867 | 8 | | 1.26 | 8 | | 1.28 |  |
| 10 | 1.29 |  | |  |  | |  |  |

| EAN 1 mol L-1 | | |  | EAN 2 mol L-1 | | |  | EAN 4 mol L-1 | | |  |
| --- | --- | --- | --- | --- | --- | --- | --- | --- | --- | --- | --- |
| [DTA+ sol]  /10-4 mol L-1 | QM  /mmol g-1 | [DTA+ sol]  /10-4 mol L-1 | | QM  /mmol g-1 | [DTA+ sol]  /10-4 mol L-1 | | QM  /mmol g-1 |  |
| 0.1 | 0.15 | 0.1 | | 0.16 | 1 | | 0.267 |  |
| 0.2 | 0.233 | 0.5 | | 0.27 | 1.3 | | 0.256 |  |
| 0.5 | 0.44 | 1 | | 0.376 | 1.8 | | 0.367 |  |
| 1 | 0.57 | 1.3 | | 0.412 | 3.7 | | 0.48 |  |
| 1.5 | 0.76 | 2 | | 0.495 | 5.5 | | 0.51 |  |
| 3 | 1.28 | 3 | | 0.582 | 7.3 | | 0.65 |  |
| 8 | 2.64 | 5 | | 0.785 | 18 | | 1.4 |  |
|  |  | 7 | | 1.1 |  | |  |  |
|  |  | 10 | | 1.37 |  | |  |  |

| EAN 6 mol L-1 | | |  | EAN 8 mol L-1 | | |  | pure EAN, 11.2 mol L-1 | | |  |
| --- | --- | --- | --- | --- | --- | --- | --- | --- | --- | --- | --- |
| [DTA+ sol]  /10-4 mol L-1 | QM  /mmol g-1 | [DTA+ sol]  /10-4 mol L-1 | | QM  /mmol g-1 | [DTA+ sol]  /10-4 mol L-1 | | QM  /mmol g-1 |  |
| 1.2 | 0.118 | 3 | | 0.068 | 6.03 | | 0.076 |  |
| 3 | 0.193 | 8 | | 0.074 | 15.8 | | 0.176 |  |
| 5 | 0.225 | 10 | | 0.15 | 19.1 | | 0.199 |  |
| 10 | 0.4 | 25 | | 0.429 | 26.3 | | 0.243 |  |
| 30 | 0.83 | 50 | | 0.8 | 28.8 | | 0.311 |  |
| 55 | 1.08 | 100 | | 1.0 | 41.7 | | 0.394 |  |
|  |  | 180 | | 1.75 | 56.2 | | 0.401 |  |
|  |  |  | |  | 61.7 | | 0.462 |  |
|  |  |  | |  | 87.1 | | 0.583 |  |
|  |  |  | |  | 95.5 | | 0.638 |  |
